# Supplementary material
Source: MDPI journal article supplement (https://www.mdpi.com/2036-7449/13/2/36)

**Supplemental Table S1.** Additional cytokine/chemokine concentrations in COVID-19, influenza (CS), burn and control patients.

| <b>Cytokine</b> | <b>Influenza (CS)</b> | <b>Burn</b>          | <b>No-DEX</b>                           | <b>DEX</b>                             | <b>Control</b>       |
|-----------------|-----------------------|----------------------|-----------------------------------------|----------------------------------------|----------------------|
| IL-1 $\alpha$   | 43<br>(13, 143)       | 18<br>(12, 26)       | 12<br>(7, 22)                           | 8 <sup>a</sup><br>(5, 12)              | 11<br>(8, 16)        |
| IL-1 $\beta$    | 33<br>(11, 99)        | 19<br>(12, 30)       | 7 <sup>a</sup><br>(4, 14)               | 5 <sup>a</sup><br>(3, 8)               | 8<br>(6, 10)         |
| IFN- $\gamma$   | 82<br>(46, 148)       | 33<br>(12, 88)       | 17 <sup>a, c</sup><br>(8, 38)           | 9 <sup>a, c</sup><br>(6, 14)           | 3<br>(2, 3)          |
| IL-10           | 290<br>(149, 566)     | 402<br>(275, 588)    | 43 <sup>a, b, c</sup><br>(19, 97)       | 67 <sup>c</sup><br>(43, 106)           | 9<br>(5, 15)         |
| G-CSF           | 900<br>(284, 2846)    | 3859<br>(1935, 7698) | 124 <sup>a, b, c</sup><br>(68, 226)     | 156 <sup>a, b, c</sup><br>(91, 268)    | 10<br>(6, 19)        |
| M-CSF           | 1519<br>(1269, 1818)  | 267<br>(139, 514)    | 352<br>(168, 741)                       | 305<br>(196, 476)                      | 108<br>(61, 192)     |
| IL-18           | 479<br>(232, 988)     | 345<br>(257, 463)    | 49 <sup>a, b</sup><br>(26, 93)          | 92 <sup>a, c</sup><br>(68, 123)        | 21<br>(13, 35)       |
| MIP-1 $\alpha$  | 194<br>(110, 344)     | 155<br>(141, 171)    | 31 <sup>a</sup><br>(14, 71)             | 26 <sup>a, b</sup><br>(14, 51)         | 14<br>(11, 17)       |
| MIG             | 44507<br>(32K, 62K)   | 52693<br>(42K, 66K)  | 5120 <sup>a, b, c</sup><br>(3427, 7650) | 7942 <sup>a, b, c</sup><br>(6055, 10K) | 2042<br>(1438, 2900) |
| MCP-3           | 562<br>(350, 902)     | 124<br>(97, 158)     | 34 <sup>a</sup><br>(22, 52)             | 39 <sup>a</sup><br>(26, 57)            | 26<br>(16, 43)       |

Geometric means of concentrations are shown in pg/ml with lower and upper 95% confidence limits in parenthesis. None of the cytokine concentrations were statistically different between DEX and No-DEX groups ( $P > 0.01$ ). N values are 17, 19, 9, 6 and 26 for No-DEX, DEX, influenza (CS), burn and control groups respectively. K represents X1000.

a  $P < 0.01$  compared to influenza (CS) group

b  $P < 0.01$  compared to burn group

c  $P < 0.01$  compared to control group

## Supplemental Figure S1

### RBD antibody development in COVID-19 patients during hospitalization.

Relative RBD IgG concentrations in No-DEX and DEX groups are shown across different days of hospitalization. In DEX group data points in blue represent days of dexamethasone use. Dashed line represents the upper 95% CI limits of antibody concentration in non-COVID-19 samples (223 RFU). Manufacturer suggested threshold value for a positive identification is 700 RFU. N = 17 for No-DEX and 19 for DEX groups on day 1.

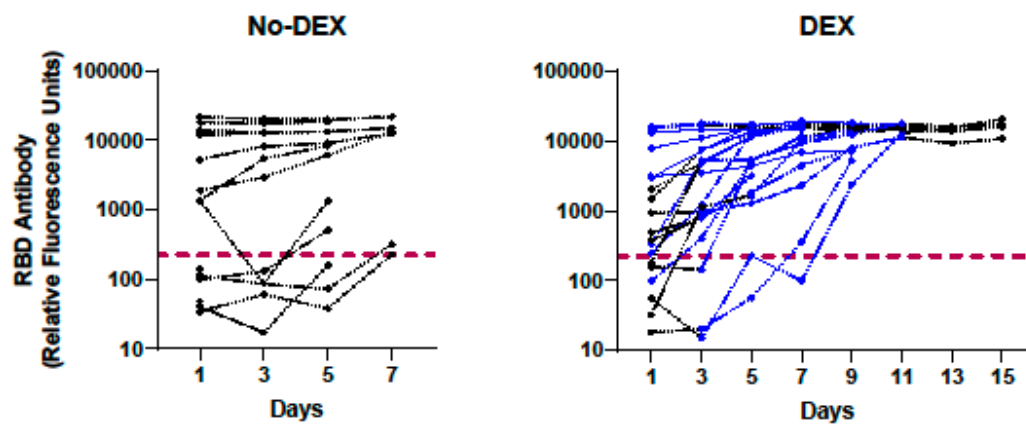

## Supplemental Figure S2

### Time-course of cytokine response in early and late stage COVID-19 infections.

Cytokine values are shown as geometric mean with 95% CI. N = 20 for early and 16 for late groups on day 1.

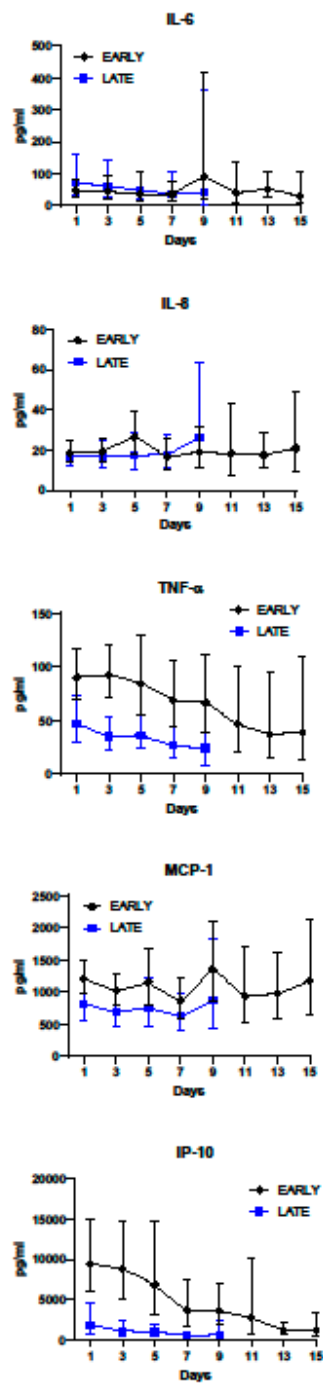

Supplement: s1 [file s1]
